# Supplementary material for: Food Web Topology and Nested Keystone Species Complexes
Source: Hindawi journal article supplement (doi:10.1155/2018/1979214), 2018-01-01
Supplement: f1 [file 1979214.f1.xlsx]

## Sheet: 27_webs_MREACH
food web	M2	n
aka a	77.78	1	0
		2	0	58
		3	0		38	76
		4	0		38		34	42
aka b	77.78	1	0
		2	0	48
		3	0		34	52
		4	0			52	9	40
ber	38.89	1	0
		2		23	44
		3	0			53	76
		4	0					2	11	38
black	41.67	1	0
		2	0	35
		3	0		19	48
		4					8	13	32	65
broad	5.56	1	19
		2		4	71
		3				1	9	54
		4				1			0	26	73
cant	8.33	1	0
		2		32	73
		3		32		29	89
		4						8	13	33	57
carpinteria	72.22	1	45
		2	45	0
		3	45		65	74
		4	45				39	81	103
cat	33.33	1	0
		2		1	20
		3		1		36	46
		4	0		20			6	45
cow1	50	1	0
		2	0	14
		3			2	23	45
		4	0	14				39	44
cow17	72.22	1	0
		2	0	43
		3	0		9	50
		4	0				2	7	33
demp au	47.22	1	0
		2	0	2
		3	0		68	76
		4				76	18	37	66
demp sp	8.33	1	0
		2		44	56
		3		44		84	86
		4						22	48	50	89
demp su	5.56	1	0
		2		59	106
		3				37	53	104
		4						104	18	64	101
german	27.78	1	0
		2	0	11
		3			5	22	76
		4				22	76	57	78
healy	16.67	1	0
		2	0	86
		3			19	48	61
		4						20	34	68	69
kyeb	22.22	1	0
		2	0	58
		3			25	89	97
		4					97	16	39	73
lilkye	41.67	1	0
		2	0	53
		3	0		22	43
		4					4	8	55	72
martins	72.22	1	0
		2	0	102
		3	0		47	81
		4	0				27	30	48
narr	77.78	1	0
		2	0	40
		3	0		54	61
		4	0		54		49	56
north	5.56	1	34
		2		2	29
		3				3	39	44
		4				3			41	47	67
powder	38.89	1	16
		2		2	34
		3	16	2		56
		4		2			27	44	77
stony	16.67	1	0
		2		27	111
		3	0			17	59
		4						22	39	49	106
sutton au	25	1	0
		2	0	50
		3		50	10	11
		4					27	45	60	77
sutton sp	0	1	0
		2		10	61
		3				9	30	70
		4							18	19	49	52
sutton su	16.67	1	0
		2	0	85
		3			17	43	78
		4						45	53	58	62
troy	77.78	1	0
		2	0	67
		3	0		36	65
		4	0		36		56	73
ven	41.67	1	2
		2	2	52
		3	2		54	63
		4					1	41	44	53
